# Supplementary material for: Adult Neurogenesis of the Medial Geniculate Body: In Vitro and Molecular Genetic Analyses Reflect the Neural Stem Cell Capacity of the Rat Auditory Thalamus over Time
Source: MDPI journal article supplement (doi:10.3390/ijms25052623), 2024-02-23
Supplement: s1 [file s1]

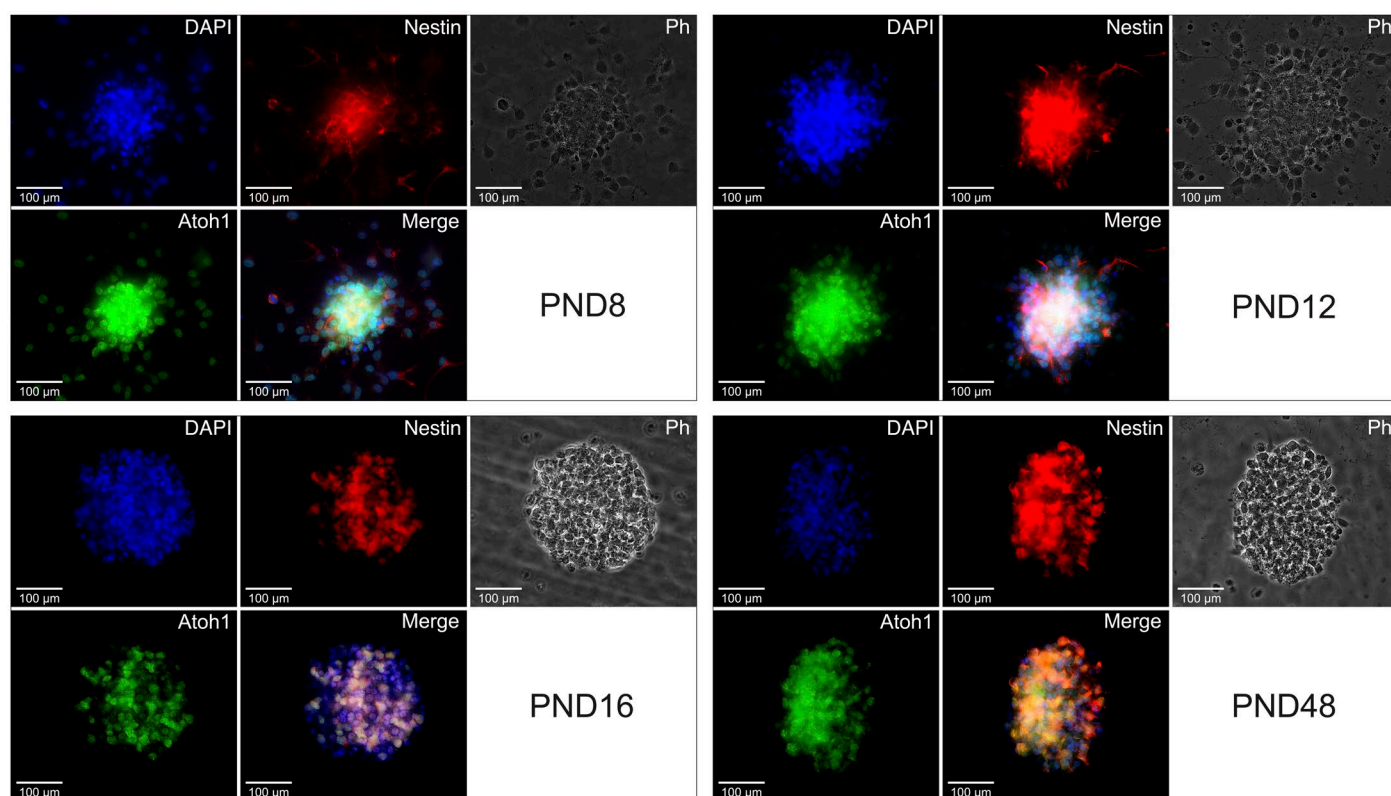

**Figure S1.** Immunocytochemical staining of the individual antibodies (DAPI, Nestin, Atoh1) and phase-contrast images of the neurospheres of all examined age groups in addition to Fig. 5 a-d.

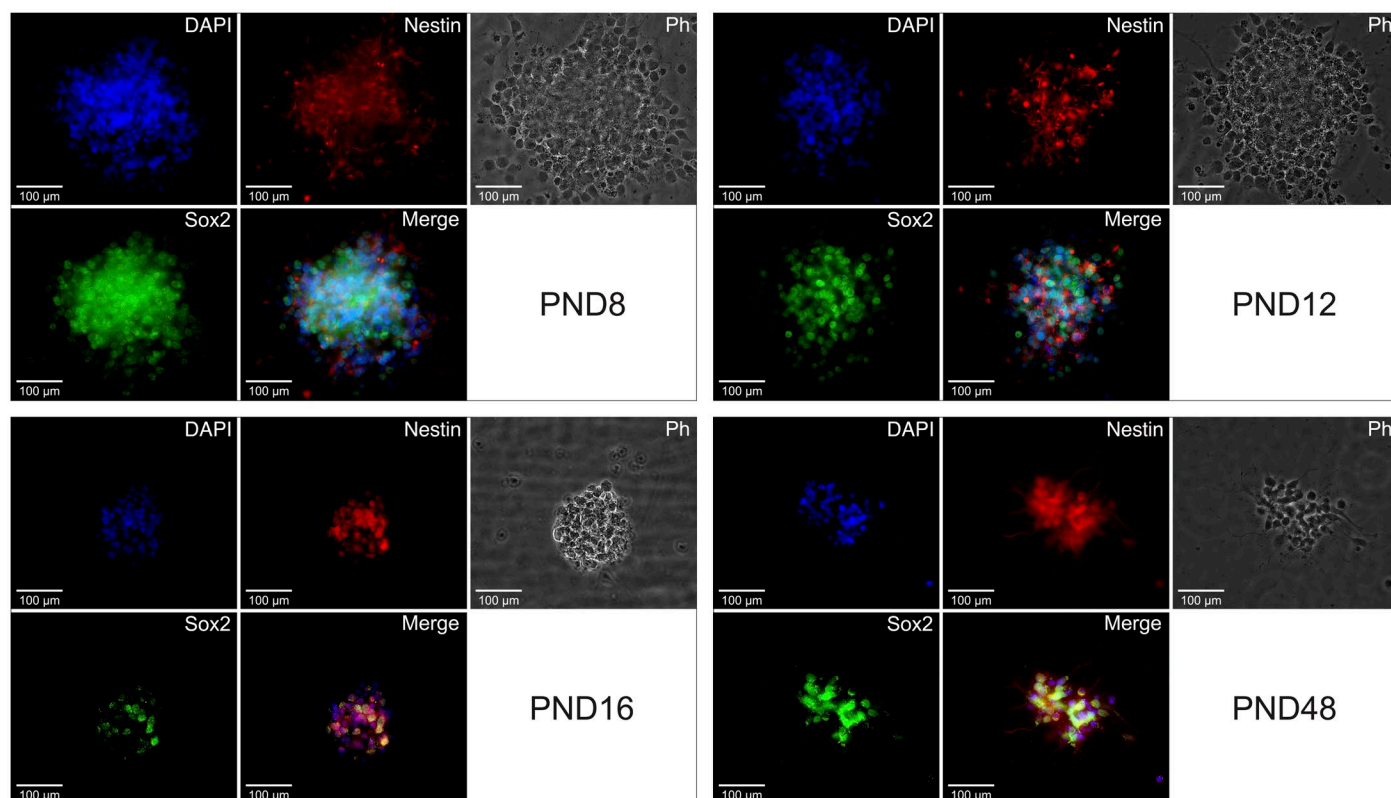

**Figure S2.** Immunocytochemical staining of the individual antibodies (DAPI, Nestin, Sox2) and phase-contrast images of the neurospheres of all examined age groups in addition to Fig. 5 e-h.

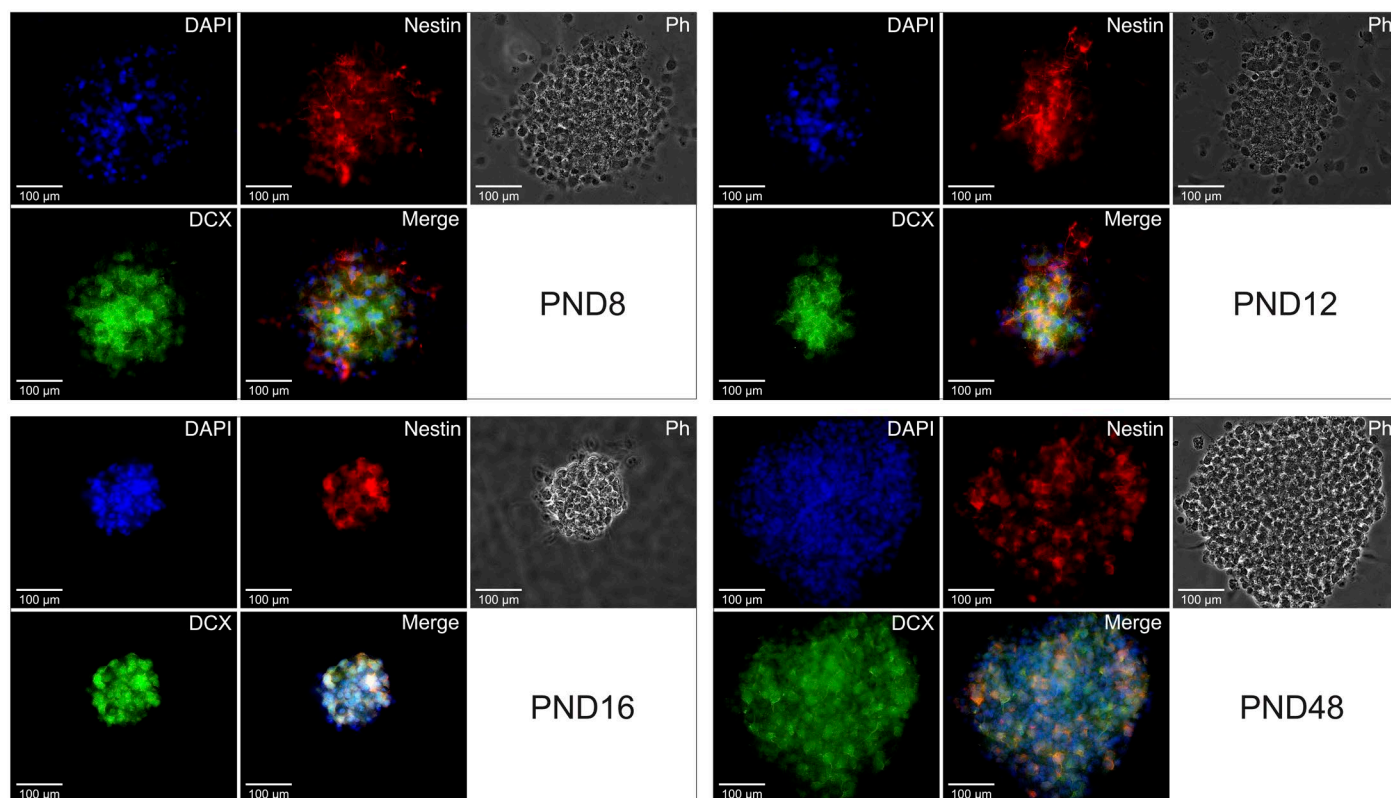

**Figure S3.** Immunocytochemical staining of the individual antibodies (DAPI, Nestin, DCX) and phase-contrast images of the neurospheres of all age groups examined in addition to Fig. 5 i-l.
