# Supplementary material for: Adult Neurogenesis of the Medial Geniculate Body: In Vitro and Molecular Genetic Analyses Reflect the Neural Stem Cell Capacity of the Rat Auditory Thalamus over Time
Source: Int J Mol Sci. 2024 Feb 23;25(5):2623. doi: 10.3390/ijms25052623 (PMC10932413; doi:10.3390/ijms25052623)
Supplement: Supplementary file 1 [file ijms-25-02623-s001.zip › additional.material.PCR.MGB..xlsx]

## Sheet: Gene Table
PCR Array Catalog #:	PARN-404Z
Position	Symbol	Description
A01	Ache	Acetylcholinesterase
A02	Adora1	Adenosine A1 receptor
A03	Adora2a	Adenosine A2a receptor
A04	Alk	Anaplastic lymphoma kinase
A05	Apbb1	Amyloid beta (A4) precursor protein-binding, family B, member 1 (Fe65)
A06	Apoe	Apolipoprotein E
A07	App	Amyloid beta (A4) precursor protein
A08	Artn	Artemin
A09	Ascl1	Achaete-scute complex homolog 1 (Drosophila)
A10	Bcl2	B-cell CLL/lymphoma 2
A11	Bdnf	Brain-derived neurotrophic factor
A12	Bmp2	Bone morphogenetic protein 2
B01	Bmp4	Bone morphogenetic protein 4
B02	Bmp8a	Bone morphogenetic protein 8a
B03	Cdk5r1	Cyclin-dependent kinase 5, regulatory subunit 1
B04	Cdk5rap2	CDK5 regulatory subunit associated protein 2
B05	Chat	Choline acetyltransferase
B06	Chrm2	Cholinergic receptor, muscarinic 2
B07	Creb1	CAMP responsive element binding protein 1
B08	Cxcl1	Chemokine (C-X-C motif) ligand 1 (melanoma growth stimulating activity, alpha)
B09	Dcx	Doublecortin
B10	Dlg4	Discs, large homolog 4 (Drosophila)
B11	Dll1	Delta-like 1 (Drosophila)
B12	Drd2	Dopamine receptor D2
C01	Dvl3	Dishevelled, dsh homolog 3 (Drosophila)
C02	Efnb1	Ephrin B1
C03	Egf	Epidermal growth factor
C04	Ep300	E1A binding protein p300
C05	Erbb2	V-erb-b2 erythroblastic leukemia viral oncogene homolog 2, neuro/glioblastoma derived oncogene homolog (avian)
C06	Fgf2	Fibroblast growth factor 2
C07	Flna	Filamin A, alpha
C08	Gdnf	Glial cell derived neurotrophic factor
C09	Gpi	Glucose phosphate isomerase
C10	Grin1	Glutamate receptor, ionotropic, N-methyl D-aspartate 1
C11	Hdac4	Histone deacetylase 4
C12	Hes1	Hairy and enhancer of split 1 (Drosophila)
D01	Hey1	Hairy/enhancer-of-split related with YRPW motif 1
D02	Hey2	Hairy/enhancer-of-split related with YRPW motif 2
D03	Heyl	Hairy/enhancer-of-split related with YRPW motif-like
D04	Il3	Interleukin 3
D05	Lif	Leukemia inhibitory factor
D06	Map2	Microtubule-associated protein 2
D07	Mdk	Midkine
D08	Mef2c	Myocyte enhancer factor 2C
D09	Kmt2a	Myeloid/lymphoid or mixed-lineage leukemia 1
D10	Ndn	Necdin homolog (mouse)
D11	Ndp	Norrie disease (pseudoglioma) (human)
D12	Neurod1	Neurogenic differentiation 1
E01	Neurog1	Neurogenin 1
E02	Neurog2	Neurogenin 2
E03	Nf1	Neurofibromin 1
E04	Nog	Noggin
E05	Notch1	Notch homolog 1, translocation-associated (Drosophila)
E06	Notch2	Notch homolog 2 (Drosophila)
E07	Nrcam	Neuronal cell adhesion molecule
E08	Nrg1	Neuregulin 1
E09	Nrp1	Neuropilin 1
E10	Nrp2	Neuropilin 2
E11	Ntf3	Neurotrophin 3
E12	Ntn1	Netrin 1
F01	Olig2	Oligodendrocyte lineage transcription factor 2
F02	Pafah1b1	Platelet-activating factor acetylhydrolase, isoform 1b, subunit 1
F03	Pard3	Par-3 (partitioning defective 3) homolog (C. elegans)
F04	Pax2	Paired box 2
F05	Pax3	Paired box 3
F06	Pax6	Paired box 6
F07	Pou3f3	POU class 3 homeobox 3
F08	Pou4f1	POU class 4 homeobox 1
F09	Ptn	Pleiotrophin
F10	Rac1	Ras-related C3 botulinum toxin substrate 1
F11	Robo1	Roundabout homolog 1 (Drosophila)
F12	Rtn4	Reticulon 4
G01	S100a6	S100 calcium binding protein A6
G02	S100b	S100 calcium binding protein B
G03	Shh	Sonic hedgehog
G04	Slit2	Slit homolog 2 (Drosophila)
G05	Sod1	Superoxide dismutase 1, soluble
G06	Sox2	SRY (sex determining region Y)-box 2
G07	Sox8	SRY (sex determining region Y)-box 8
G08	Stat3	Signal transducer and activator of transcription 3
G09	Tgfb1	Transforming growth factor, beta 1
G10	Th	Tyrosine hydroxylase
G11	Tnr	Tenascin R
G12	Vegfa	Vascular endothelial growth factor A
H01	Actb	Actin, beta
H02	B2m	Beta-2 microglobulin
H03	Hprt1	Hypoxanthine phosphoribosyltransferase 1
H04	Ldha	Lactate dehydrogenase A
H05	Rplp1	Ribosomal protein, large, P1
H06	RGDC	Rat Genomic DNA Contamination
H07	RTC	Reverse Transcription Control
H08	RTC	Reverse Transcription Control
H09	RTC	Reverse Transcription Control
H10	PPC	Positive PCR Control
H11	PPC	Positive PCR Control
H12	PPC	Positive PCR Control

## Sheet: Average Ct
Position	Symbol	AVG Ct				Standard Deviation
		PND 8	PND 12	PND 16	PND 40+	PND 8	PND 12	PND 16	PND 40+
A01	Ache	22.76	22.00	23.80	24.24	2.807403	2.053233	2.959717	0.998593
A02	Adora1	22.26	21.56	21.13	22.95	1.625684	1.454218	1.720921	0.680875
A03	Adora2a	26.72	27.18	26.31	28.78	2.021518	0.672406	1.834235	0.547128
A04	Alk	29.75	29.14	29.44	32.38	1.917485	1.846155	1.386733	2.309962
A05	Apbb1	22.09	22.40	21.54	24.04	1.804996	0.959705	1.685380	1.001012
A06	Apoe	18.99	19.18	17.50	19.77	1.899169	0.941771	1.523067	0.817736
A07	App	17.91	18.13	17.05	19.34	1.778359	0.618636	1.515216	0.576668
A08	Artn	27.24	27.51	27.11	28.89	1.633320	0.352054	1.598608	1.535227
A09	Ascl1	26.03	26.91	26.00	31.01	1.352245	0.176296	0.555053	1.720355
A10	Bcl2	24.38	24.91	24.13	26.46	2.284098	0.710019	1.334723	0.707941
A11	Bdnf	27.06	27.06	25.35	29.69	0.651302	0.275681	0.826153	0.895130
A12	Bmp2	25.80	26.63	26.91	29.90	1.290075	0.091431	1.951608	0.840533
B01	Bmp4	28.38	27.38	27.05	29.13	0.889795	1.716474	3.629289	1.293028
B02	Bmp8a	28.13	28.26	29.40	28.89	2.111173	0.913441	3.136563	1.474717
B03	Cdk5r1	20.54	21.35	20.74	23.05	1.485003	0.180315	1.681903	0.672365
B04	Cdk5rap2	24.71	25.63	25.32	28.17	1.867472	0.337263	1.664241	1.900811
B05	Chat	33.12	32.99	30.35	35.00	1.754264	1.756963	0.641497	0.000000
B06	Chrm2	23.64	23.86	23.24	25.22	1.542051	0.511297	1.612524	0.524993
B07	Creb1	22.64	23.50	22.44	24.95	1.851316	0.174950	1.563486	0.339436
B08	Cxcl1	30.74	29.83	30.11	31.02	0.552541	0.817155	1.479034	0.687321
B09	Dcx	22.27	24.67	25.94	29.21	1.113767	1.804967	2.252972	0.313847
B10	Dlg4	20.57	21.25	20.05	23.60	1.633783	0.405088	0.789578	0.861319
B11	Dll1	29.08	28.80	29.03	30.58	2.363164	1.197113	1.850014	1.361293
B12	Drd2	26.07	26.98	26.79	30.03	2.105970	0.326874	1.067721	0.429245
C01	Dvl3	25.53	25.91	25.30	28.43	0.809014	0.686441	1.603009	0.940813
C02	Efnb1	24.96	25.96	25.77	28.81	1.276269	0.226945	1.272915	0.575152
C03	Egf	26.82	27.32	26.94	28.22	1.523693	0.512302	1.408044	0.832062
C04	Ep300	23.11	23.48	22.85	25.75	1.507457	0.445905	1.386744	0.825961
C05	Erbb2	27.25	27.98	27.61	29.68	1.848317	0.652368	1.864094	1.127602
C06	Fgf2	26.10	25.98	23.58	26.19	2.015948	1.147400	1.076569	0.722999
C07	Flna	22.53	23.13	23.64	25.99	1.640558	0.379332	2.418513	0.552878
C08	Gdnf	29.89	30.33	30.70	33.72	1.646043	0.475890	0.870880	2.210497
C09	Gpi	20.20	20.57	19.45	22.24	1.622265	0.601696	1.606913	0.582804
C10	Grin1	23.21	23.22	22.27	25.11	1.491252	0.930809	1.243020	0.684600
C11	Hdac4	22.05	22.81	21.91	25.10	1.931249	0.488903	1.374847	0.732647
C12	Hes1	23.69	24.62	23.15	26.32	1.814292	0.074154	1.502600	0.792817
D01	Hey1	23.29	23.29	22.97	23.93	1.763129	0.870998	1.972645	0.435336
D02	Hey2	26.08	26.02	25.71	28.22	1.896645	0.860522	1.870804	0.580757
D03	Heyl	25.66	24.93	24.19	25.16	1.772887	1.495145	1.717488	0.684300
D04	Il3	35.00	33.64	34.30	33.58	0.000000	1.433649	1.162685	0.510411
D05	Lif	34.83	33.52	31.84	32.35	0.300482	1.284359	0.433522	0.806987
D06	Map2	18.00	18.73	18.13	20.91	1.449203	0.169907	0.997261	0.458030
D07	Mdk	23.12	23.27	22.46	24.36	2.404612	1.061672	1.969573	0.616963
D08	Mef2c	20.27	21.84	20.50	23.97	0.501676	1.354413	0.730639	0.410408
D09	Kmt2a	23.04	23.96	22.83	25.23	1.954634	0.330857	1.128528	0.549507
D10	Ndn	20.33	20.76	21.08	23.44	2.027692	0.864463	1.839557	0.878768
D11	Ndp	25.73	25.68	24.52	26.89	1.787514	0.909739	1.353785	0.928996
D12	Neurod1	26.53	27.23	26.16	30.28	1.059752	1.210535	0.871867	1.002205
E01	Neurog1	34.81	31.84	30.88	32.68	0.328250	1.665601	0.726133	1.541360
E02	Neurog2	30.85	32.26	30.08	34.06	2.870871	2.259002	1.594033	0.896229
E03	Nf1	23.32	23.22	22.58	24.93	1.134456	0.499669	1.552587	0.417616
E04	Nog	24.55	24.68	23.38	25.64	1.679963	0.870928	1.439895	0.606257
E05	Notch1	27.59	27.76	26.86	30.44	0.730187	0.546186	1.740699	0.503605
E06	Notch2	24.57	24.98	24.43	27.05	1.781892	0.678783	1.739592	0.543187
E07	Nrcam	20.47	21.27	19.99	23.08	1.150650	0.291468	1.089620	0.437593
E08	Nrg1	24.20	24.55	24.68	26.21	1.777384	0.792467	2.003797	0.336161
E09	Nrp1	25.08	25.41	24.72	28.77	1.185378	0.277561	1.780192	0.425709
E10	Nrp2	22.45	23.78	23.94	26.91	0.842529	0.853604	1.754238	0.849150
E11	Ntf3	25.21	25.66	27.07	28.53	1.400148	0.223917	1.999514	2.706947
E12	Ntn1	16.87	24.33	12.73	22.40	4.801076	1.012926	9.564844	1.328844
F01	Olig2	24.42	24.31	24.17	27.32	2.220884	1.442232	2.444116	1.055714
F02	Pafah1b1	18.64	19.27	18.45	20.77	1.708928	0.346537	1.612364	0.462311
F03	Pard3	26.18	26.49	25.79	28.41	1.660188	0.687661	1.453375	0.725226
F04	Pax2	33.80	33.00	34.20	33.64	2.075283	1.742851	1.390709	1.570059
F05	Pax3	31.72	30.09	31.99	30.18	5.686552	4.257726	5.212469	0.819556
F06	Pax6	26.17	26.82	25.82	28.25	1.989667	0.344219	1.387536	0.371144
F07	Pou3f3	21.75	22.95	21.36	25.18	0.613488	0.973088	0.784279	0.690975
F08	Pou4f1	34.73	32.87	33.08	33.48	0.264453	1.284916	2.880512	1.400497
F09	Ptn	17.35	18.27	17.88	21.25	2.277229	0.495206	1.823592	0.366541
F10	Rac1	19.81	20.40	19.68	21.89	1.814068	0.432533	1.766950	0.414626
F11	Robo1	21.11	21.93	22.11	24.05	2.093938	0.414633	2.311091	0.672315
F12	Rtn4	18.26	18.86	18.11	20.31	1.843833	0.506371	1.661324	0.413961
G01	S100a6	25.17	26.38	24.61	27.50	0.445660	1.006235	0.885346	0.594943
G02	S100b	20.24	19.99	17.22	18.77	2.218066	1.378128	0.923571	0.407210
G03	Shh	30.78	30.03	29.44	30.18	1.265788	1.220525	2.627915	0.491140
G04	Slit2	24.39	25.76	24.31	33.18	0.559517	1.172816	1.036381	3.144083
G05	Sod1	19.77	20.26	19.06	20.89	2.206068	0.602669	1.687285	0.554367
G06	Sox2	23.72	23.76	23.72	25.70	2.770169	1.699719	2.243300	0.982565
G07	Sox8	25.82	25.41	24.42	27.14	1.963587	1.254929	1.903249	0.689158
G08	Stat3	22.92	23.37	22.30	24.91	2.074136	0.794227	1.481306	0.369280
G09	Tgfb1	26.01	26.00	25.66	29.04	1.912965	1.187427	1.242583	1.469596
G10	Th	26.95	26.53	27.34	33.00	3.014502	1.990207	0.873561	1.849436
G11	Tnr	21.71	21.91	20.90	23.89	1.801667	0.816847	1.715289	0.513421
G12	Vegfa	21.76	22.39	21.24	23.67	1.857283	0.448391	1.360919	0.406191
H01	Actb	15.85	17.06	17.17	19.73	0.967802	0.221382	1.517791	0.270388
H02	B2m	19.46	19.87	18.74	20.87	1.661555	0.303157	1.549771	0.532567
H03	Hprt1	21.04	21.30	20.30	21.88	1.290387	0.356976	1.626601	0.545591
H04	Ldha	19.86	20.76	20.15	23.45	1.554765	0.132531	1.279873	0.441754
H05	Rplp1	17.78	18.71	17.81	20.34	1.804191	0.131921	1.068271	0.493561

## Sheet: Average Delta (Ct)
Position	Symbol	AVG Delta(Ct) (Ct(GOI) - Ave Ct(HKG))				Standard Deviation
		PND 8	PND 12	PND 16	PND 40+	PND 8	PND 12	PND 16	PND 40+
A01	Ache	3.35	1.99	4.75	3.12	1.290026	1.910851	1.738327	1.326084
A02	Adora1	2.85	1.55	2.07	1.83	0.081215	1.306179	0.430484	0.936842
A03	Adora2a	7.31	7.18	7.26	7.67	0.506730	0.520600	0.721378	0.659418
A04	Alk	10.34	9.14	10.39	11.27	0.603716	1.698865	0.288226	2.594384
A05	Apbb1	2.68	2.40	2.49	2.93	0.319790	0.806384	0.565722	1.276348
A06	Apoe	-0.42	-0.82	-1.55	-1.34	0.355156	0.796391	0.286618	0.994345
A07	App	-1.50	-1.88	-2.01	-1.77	0.235352	0.468217	0.194000	0.690743
A08	Artn	7.83	7.50	8.06	7.78	0.195585	0.211701	0.374058	1.845697
A09	Ascl1	6.61	6.90	6.95	9.89	0.379160	0.214782	0.794849	1.965923
A10	Bcl2	4.97	4.91	5.08	5.35	0.741834	0.576583	0.007226	0.795957
A11	Bdnf	7.65	7.05	6.30	8.58	0.894719	0.076980	1.058769	0.483587
A12	Bmp2	6.39	6.62	7.86	8.79	0.487662	0.212511	0.708496	0.395201
B01	Bmp4	8.96	7.38	8.00	8.02	0.664636	1.551080	2.300626	1.373148
B02	Bmp8a	8.71	8.25	10.35	7.78	0.584892	0.738059	1.946653	1.771846
B03	Cdk5r1	1.13	1.34	1.69	1.94	0.069196	0.044724	0.345019	0.782826
B04	Cdk5rap2	5.30	5.62	6.27	7.06	0.332633	0.128802	0.362652	2.151625
B05	Chat	13.71	12.99	11.30	13.89	3.090487	1.732436	1.504061	0.518271
B06	Chrm2	4.23	3.85	4.19	4.11	0.153228	0.370622	0.339011	0.389982
B07	Creb1	3.23	3.50	3.38	3.84	0.330908	0.117373	0.249302	0.330979
B08	Cxcl1	11.33	9.82	11.06	9.91	1.380046	0.701278	1.000571	1.175376
B09	Dcx	2.86	4.67	6.89	8.10	0.443682	1.952687	0.928036	0.546397
B10	Dlg4	1.16	1.24	1.00	2.49	0.254478	0.205724	0.596528	1.062736
B11	Dll1	9.66	8.80	9.98	9.47	0.823065	1.026031	0.745386	1.556600
B12	Drd2	6.66	6.97	7.73	8.92	0.573429	0.202671	0.334276	0.252422
C01	Dvl3	6.12	5.90	6.25	7.32	0.812953	0.555481	0.267046	0.435983
C02	Efnb1	5.55	5.96	6.72	7.70	0.347866	0.346103	0.065115	0.608047
C03	Egf	7.41	7.31	7.89	7.11	0.172237	0.352865	0.370145	1.203674
C04	Ep300	3.70	3.48	3.80	4.64	0.054297	0.227014	0.185241	0.973015
C05	Erbb2	7.84	7.97	8.56	8.57	0.324329	0.471658	0.543797	1.255243
C06	Fgf2	6.69	5.98	4.53	5.08	0.486542	0.964367	0.468273	0.902449
C07	Flna	3.12	3.13	4.59	4.88	0.101725	0.225926	1.126863	0.642399
C08	Gdnf	10.48	10.33	11.65	12.61	0.606933	0.255178	0.467422	2.084482
C09	Gpi	0.79	0.56	0.39	1.13	0.080534	0.452596	0.285761	0.722670
C10	Grin1	3.79	3.21	3.22	4.00	0.079788	0.773694	0.107047	0.845894
C11	Hdac4	2.64	2.80	2.86	3.99	0.386674	0.334483	0.071203	0.803343
C12	Hes1	4.28	4.62	4.10	5.21	0.304571	0.157568	0.412306	0.447012
D01	Hey1	3.88	3.29	3.92	2.82	0.218668	0.704711	0.652016	0.706677
D02	Hey2	6.67	6.01	6.65	7.11	0.353813	0.666608	0.557517	0.659401
D03	Heyl	6.25	4.92	5.14	4.05	0.245695	1.333340	0.401585	0.876769
D04	Il3	15.59	13.64	15.25	12.47	1.544656	1.425035	0.590898	0.697172
D05	Lif	15.41	13.51	12.78	11.24	1.783237	1.160264	0.961087	1.088623
D06	Map2	-1.41	-1.28	-0.92	-0.20	0.100746	0.128799	0.612448	0.428802
D07	Mdk	3.71	3.26	3.41	3.25	0.861281	0.914919	0.734567	0.729421
D08	Mef2c	0.86	1.83	1.45	2.85	1.624685	1.487097	1.221623	0.322357
D09	Kmt2a	3.63	3.95	3.78	4.12	0.422651	0.142559	0.238882	0.684128
D10	Ndn	0.92	0.75	2.03	2.33	0.490826	0.684450	0.636679	1.095888
D11	Ndp	6.31	5.67	5.47	5.78	0.287308	0.727525	0.201927	0.932563
D12	Neurod1	7.12	7.23	7.11	9.17	2.385300	1.359701	0.918849	0.574948
E01	Neurog1	15.40	11.83	11.83	11.57	1.637720	1.512935	0.933387	1.868179
E02	Neurog2	11.44	12.25	11.03	12.95	1.327773	2.090963	0.436556	1.381315
E03	Nf1	3.91	3.22	3.53	3.82	0.414347	0.294227	0.272129	0.414023
E04	Nog	5.13	4.68	4.33	4.53	0.229285	0.705291	0.176168	0.657419
E05	Notch1	8.18	7.75	7.80	9.33	0.814634	0.334602	0.412538	0.562033
E06	Notch2	5.16	4.97	5.37	5.93	0.249645	0.525259	0.427983	0.502947
E07	Nrcam	1.06	1.26	0.93	1.97	0.415191	0.378322	0.518767	0.516673
E08	Nrg1	4.79	4.54	5.63	5.10	0.263260	0.603401	0.671220	0.349680
E09	Nrp1	5.67	5.40	5.67	7.66	0.359454	0.101224	0.444303	0.619492
E10	Nrp2	3.04	3.77	4.89	5.80	1.019822	0.966023	0.423632	0.712138
E11	Ntf3	5.80	5.65	8.02	7.42	0.154846	0.010182	0.974670	2.968049
E12	Ntn1	-2.54	4.32	-6.33	1.29	5.879962	0.815939	10.590487	1.082719
F01	Olig2	5.01	4.30	5.12	6.21	0.677984	1.277965	1.257133	1.275901
F02	Pafah1b1	-0.77	-0.74	-0.60	-0.34	0.227142	0.127958	0.281286	0.332473
F03	Pard3	6.77	6.48	6.73	7.30	0.135044	0.485098	0.117935	0.854144
F04	Pax2	14.39	12.99	15.14	12.53	0.800984	1.587116	0.587570	1.633411
F05	Pax3	12.31	10.08	12.94	9.07	4.259317	4.104915	4.037314	0.375212
F06	Pax6	6.76	6.82	6.77	7.14	0.447151	0.156455	0.273782	0.624372
F07	Pou3f3	2.34	2.95	2.31	4.07	1.044461	1.107465	0.831531	0.637987
F08	Pou4f1	15.32	12.86	14.03	12.37	1.288752	1.106472	1.846806	1.647576
F09	Ptn	-2.06	-1.74	-1.17	0.14	0.732734	0.296897	0.516539	0.325518
F10	Rac1	0.40	0.39	0.63	0.78	0.292178	0.216473	0.431852	0.426729
F11	Robo1	1.70	1.92	3.05	2.94	0.563850	0.225147	1.014547	0.701573
F12	Rtn4	-1.15	-1.14	-0.94	-0.80	0.299214	0.318263	0.323996	0.380674
G01	S100a6	5.76	6.37	5.56	6.38	1.230438	1.126496	0.626306	0.377065
G02	S100b	0.83	-0.02	-1.83	-2.34	0.694331	1.213486	0.602639	0.230018
G03	Shh	11.36	10.02	10.39	9.07	1.072618	1.053419	1.326935	0.591240
G04	Slit2	4.98	5.75	5.26	12.07	1.734642	1.314726	2.078259	3.656498
G05	Sod1	0.36	0.25	0.01	-0.22	0.710124	0.401977	0.350510	0.062517
G06	Sox2	4.31	3.75	4.66	4.59	1.231836	1.544436	0.994277	1.190617
G07	Sox8	6.41	5.40	5.37	6.03	0.424811	1.084872	0.570320	0.877492
G08	Stat3	3.51	3.36	3.25	3.80	0.532907	0.601692	0.144197	0.389957
G09	Tgfb1	6.60	5.99	6.61	7.93	0.401792	1.006638	0.391984	1.884069
G10	Th	7.53	6.52	8.29	11.89	1.490763	1.836214	0.701279	2.074712
G11	Tnr	2.30	1.90	1.85	2.78	0.292228	0.645096	0.453040	0.599677
G12	Vegfa	2.35	2.39	2.19	2.56	0.319612	0.241499	0.047971	0.564254
H01	Actb	-3.57	-2.95	-1.89	-1.39	0.796296	0.235512	0.184031	0.439230
H02	B2m	0.05	-0.14	-0.31	-0.24	0.310923	0.174792	0.413306	0.080021
H03	Hprt1	1.63	1.29	1.24	0.77	0.272284	0.153472	0.324087	0.045071
H04	Ldha	0.44	0.76	1.10	2.34	0.157539	0.156150	0.058529	0.403753
H05	Rplp1	-1.63	-1.29	-1.24	-0.77	0.272284	0.153472	0.324087	0.045071

## Sheet: 2^(-Avg.(Delta(Ct))
Position	Symbol	2^(-Avg.(Delta(Ct))
		PND 8	PND 12	PND 16	PND 40+
A01	Ache	0.098297	0.251931	0.037167	0.114659
A02	Adora1	0.138951	0.341379	0.237709	0.280324
A03	Adora2a	0.006313	0.006917	0.006535	0.004902
A04	Alk	0.000773	0.001776	0.000747	0.000404
A05	Apbb1	0.156126	0.189922	0.178042	0.131216
A06	Apoe	1.336427	1.770032	2.935719	2.537841
A07	App	2.831486	3.683095	4.013995	3.409666
A08	Artn	0.004391	0.005515	0.003757	0.004540
A09	Ascl1	0.010205	0.008346	0.008114	0.001050
A10	Bcl2	0.031959	0.033328	0.029651	0.024544
A11	Bdnf	0.004993	0.007540	0.012716	0.002618
A12	Bmp2	0.011926	0.010173	0.004306	0.002262
B01	Bmp4	0.002003	0.006014	0.003914	0.003859
B02	Bmp8a	0.002382	0.003284	0.000768	0.004540
B03	Cdk5r1	0.457846	0.393716	0.309933	0.261518
B04	Cdk5rap2	0.025340	0.020356	0.012953	0.007487
B05	Chat	0.000075	0.000123	0.000397	0.000066
B06	Chrm2	0.053405	0.069205	0.054718	0.057898
B07	Creb1	0.106606	0.088618	0.095780	0.069859
B08	Cxcl1	0.000389	0.001107	0.000469	0.001038
B09	Dcx	0.138200	0.039393	0.008436	0.003655
B10	Dlg4	0.446971	0.423356	0.499422	0.177636
B11	Dll1	0.001232	0.002248	0.000993	0.001406
B12	Drd2	0.009885	0.007982	0.004703	0.002061
C01	Dvl3	0.014351	0.016732	0.013182	0.006267
C02	Efnb1	0.021327	0.016120	0.009515	0.004801
C03	Egf	0.005888	0.006290	0.004222	0.007258
C04	Ep300	0.076953	0.089821	0.071691	0.040147
C05	Erbb2	0.004370	0.003986	0.002647	0.002629
C06	Fgf2	0.009696	0.015870	0.043291	0.029607
C07	Flna	0.115242	0.114460	0.041461	0.033929
C08	Gdnf	0.000702	0.000779	0.000312	0.000160
C09	Gpi	0.579852	0.678290	0.761265	0.457492
C10	Grin1	0.072069	0.108172	0.107641	0.062620
C11	Hdac4	0.160376	0.143739	0.137709	0.063013
C12	Hes1	0.051358	0.040761	0.058247	0.027050
D01	Hey1	0.067934	0.102583	0.066071	0.141605
D02	Hey2	0.009818	0.015523	0.009925	0.007220
D03	Heyl	0.013180	0.032962	0.028325	0.060454
D04	Il3	0.000020	0.000079	0.000026	0.000176
D05	Lif	0.000023	0.000086	0.000142	0.000412
D06	Map2	2.654950	2.422213	1.895440	1.147482
D07	Mdk	0.076242	0.104153	0.094172	0.105131
D08	Mef2c	0.552462	0.281557	0.366451	0.138265
D09	Kmt2a	0.080716	0.064795	0.072999	0.057641
D10	Ndn	0.529025	0.592831	0.245297	0.199187
D11	Ndp	0.012573	0.019580	0.022548	0.018196
D12	Neurod1	0.007188	0.006680	0.007238	0.001731
E01	Neurog1	0.000023	0.000275	0.000275	0.000329
E02	Neurog2	0.000361	0.000205	0.000478	0.000126
E03	Nf1	0.066421	0.107578	0.086672	0.070812
E04	Nog	0.028483	0.039108	0.049856	0.043258
E05	Notch1	0.003457	0.004639	0.004479	0.001556
E06	Notch2	0.027923	0.031919	0.024116	0.016346
E07	Nrcam	0.480541	0.416708	0.523913	0.256137
E08	Nrg1	0.036133	0.042948	0.020239	0.029255
E09	Nrp1	0.019661	0.023710	0.019632	0.004949
E10	Nrp2	0.121685	0.073378	0.033772	0.017964
E11	Ntf3	0.017911	0.019921	0.003862	0.005835
E12	Ntn1	5.802729	0.049959	80.226567	0.408082
F01	Olig2	0.031087	0.050821	0.028825	0.013541
F02	Pafah1b1	1.701884	1.669515	1.516684	1.263080
F03	Pard3	0.009148	0.011183	0.009406	0.006356
F04	Pax2	0.000047	0.000123	0.000028	0.000169
F05	Pax3	0.000198	0.000921	0.000127	0.001857
F06	Pax6	0.009244	0.008870	0.009162	0.007073
F07	Pou3f3	0.197494	0.129678	0.201688	0.059559
F08	Pou4f1	0.000024	0.000134	0.000060	0.000189
F09	Ptn	4.175885	3.331680	2.249305	0.909908
F10	Rac1	0.758258	0.764075	0.646962	0.582283
F11	Robo1	0.308224	0.263939	0.120420	0.130649
F12	Rtn4	2.221939	2.210766	1.921919	1.737725
G01	S100a6	0.018473	0.012058	0.021179	0.011971
G02	S100b	0.564305	1.013595	3.556258	5.050336
G03	Shh	0.000379	0.000962	0.000745	0.001859
G04	Slit2	0.031731	0.018588	0.026180	0.000232
G05	Sod1	0.777651	0.840999	0.992798	1.167891
G06	Sox2	0.050464	0.074398	0.039496	0.041442
G07	Sox8	0.011790	0.023644	0.024175	0.015322
G08	Stat3	0.087909	0.097294	0.105366	0.071892
G09	Tgfb1	0.010336	0.015701	0.010229	0.004114
G10	Th	0.005392	0.010891	0.003192	0.000264
G11	Tnr	0.203723	0.267837	0.277402	0.146012
G12	Vegfa	0.196283	0.191340	0.219602	0.170064
H01	Actb	11.844699	7.703337	3.697411	2.613035
H02	B2m	0.968665	1.098877	1.240780	1.181378
H03	Hprt1	0.323664	0.407727	0.422272	0.586634
H04	Ldha	0.734752	0.591718	0.465860	0.198084
H05	Rplp1	3.089622	2.452619	2.368142	1.704639

## Sheet: Fold Change
Position	Symbol	Fold Change
		PND 8 vs PND 12		PND 8 vs PND 16		PND 8 vs PND 40+		PND 12 vs PND 16		PND 12 vs PND 40+		PND 16 vs PND 40+
		Fold Change		Fold Change		Fold Change		Fold Change		Fold Change		Fold Change
A01	Ache	2.56		0.38		1.17		0.15		0.46		3.08
A02	Adora1	2.46		1.71		2.02		0.70		0.82		1.18
A03	Adora2a	1.10		1.04		0.78		0.94		0.71		0.75
A04	Alk	2.30		0.97		0.52		0.42		0.23		0.54
A05	Apbb1	1.22		1.14		0.84		0.94		0.69		0.74
A06	Apoe	1.32		2.20		1.90		1.66		1.43		0.86
A07	App	1.30		1.42		1.20		1.09		0.93		0.85
A08	Artn	1.26		0.86		1.03		0.68		0.82		1.21
A09	Ascl1	0.82		0.80		0.10		0.97		0.13		0.13
A10	Bcl2	1.04		0.93		0.77		0.89		0.74		0.83
A11	Bdnf	1.51		2.55		0.52		1.69		0.35		0.21
A12	Bmp2	0.85		0.36		0.19		0.42		0.22		0.53
B01	Bmp4	3.00		1.95		1.93		0.65		0.64		0.99
B02	Bmp8a	1.38		0.32		1.91		0.23		1.38		5.91
B03	Cdk5r1	0.86		0.68		0.57		0.79		0.66		0.84
B04	Cdk5rap2	0.80		0.51		0.30		0.64		0.37		0.58
B05	Chat	1.65		5.30		0.88		3.22		0.53		0.17
B06	Chrm2	1.30		1.02		1.08		0.79		0.84		1.06
B07	Creb1	0.83		0.90		0.66		1.08		0.79		0.73
B08	Cxcl1	2.84		1.20		2.67		0.42		0.94		2.21
B09	Dcx	0.29		0.06		0.03		0.21		0.09		0.43
B10	Dlg4	0.95		1.12		0.40		1.18		0.42		0.36
B11	Dll1	1.82		0.81		1.14		0.44		0.63		1.42
B12	Drd2	0.81		0.48		0.21		0.59		0.26		0.44
C01	Dvl3	1.17		0.92		0.44		0.79		0.37		0.48
C02	Efnb1	0.76		0.45		0.23		0.59		0.30		0.50
C03	Egf	1.07		0.72		1.23		0.67		1.15		1.72
C04	Ep300	1.17		0.93		0.52		0.80		0.45		0.56
C05	Erbb2	0.91		0.61		0.60		0.66		0.66		0.99
C06	Fgf2	1.64		4.46		3.05		2.73		1.87		0.68
C07	Flna	0.99		0.36		0.29		0.36		0.30		0.82
C08	Gdnf	1.11		0.44		0.23		0.40		0.20		0.51
C09	Gpi	1.17		1.31		0.79		1.12		0.67		0.60
C10	Grin1	1.50		1.49		0.87		1.00		0.58		0.58
C11	Hdac4	0.90		0.86		0.39		0.96		0.44		0.46
C12	Hes1	0.79		1.13		0.53		1.43		0.66		0.46
D01	Hey1	1.51		0.97		2.08		0.64		1.38		2.14
D02	Hey2	1.58		1.01		0.74		0.64		0.47		0.73
D03	Heyl	2.50		2.15		4.59		0.86		1.83		2.13
D04	Il3	3.87		1.27		8.69		0.33		2.25		6.86
D05	Lif	3.74		6.20		18.02		1.66		4.82		2.91
D06	Map2	0.91		0.71		0.43		0.78		0.47		0.61
D07	Mdk	1.37		1.24		1.38		0.90		1.01		1.12
D08	Mef2c	0.51		0.66		0.25		1.30		0.49		0.38
D09	Kmt2a	0.80		0.90		0.71		1.13		0.89		0.79
D10	Ndn	1.12		0.46		0.38		0.41		0.34		0.81
D11	Ndp	1.56		1.79		1.45		1.15		0.93		0.81
D12	Neurod1	0.93		1.01		0.24		1.08		0.26		0.24
E01	Neurog1	11.87		11.88		14.23		1.00		1.20		1.20
E02	Neurog2	0.57		1.32		0.35		2.33		0.62		0.26
E03	Nf1	1.62		1.30		1.07		0.81		0.66		0.82
E04	Nog	1.37		1.75		1.52		1.27		1.11		0.87
E05	Notch1	1.34		1.30		0.45		0.97		0.34		0.35
E06	Notch2	1.14		0.86		0.59		0.76		0.51		0.68
E07	Nrcam	0.87		1.09		0.53		1.26		0.61		0.49
E08	Nrg1	1.19		0.56		0.81		0.47		0.68		1.45
E09	Nrp1	1.21		1.00		0.25		0.83		0.21		0.25
E10	Nrp2	0.60		0.28		0.15		0.46		0.24		0.53
E11	Ntf3	1.11		0.22		0.33		0.19		0.29		1.51
E12	Ntn1	0.01		13.83		0.07		1605.86		8.17		0.01
F01	Olig2	1.63		0.93		0.44		0.57		0.27		0.47
F02	Pafah1b1	0.98		0.89		0.74		0.91		0.76		0.83
F03	Pard3	1.22		1.03		0.69		0.84		0.57		0.68
F04	Pax2	2.64		0.59		3.62		0.22		1.37		6.11
F05	Pax3	4.66		0.65		9.40		0.14		2.02		14.57
F06	Pax6	0.96		0.99		0.77		1.03		0.80		0.77
F07	Pou3f3	0.66		1.02		0.30		1.56		0.46		0.30
F08	Pou4f1	5.48		2.44		7.73		0.44		1.41		3.17
F09	Ptn	0.80		0.54		0.22		0.68		0.27		0.40
F10	Rac1	1.01		0.85		0.77		0.85		0.76		0.90
F11	Robo1	0.86		0.39		0.42		0.46		0.49		1.08
F12	Rtn4	0.99		0.86		0.78		0.87		0.79		0.90
G01	S100a6	0.65		1.15		0.65		1.76		0.99		0.57
G02	S100b	1.80		6.30		8.95		3.51		4.98		1.42
G03	Shh	2.54		1.96		4.90		0.77		1.93		2.50
G04	Slit2	0.59		0.83		0.01		1.41		0.01		0.01
G05	Sod1	1.08		1.28		1.50		1.18		1.39		1.18
G06	Sox2	1.47		0.78		0.82		0.53		0.56		1.05
G07	Sox8	2.01		2.05		1.30		1.02		0.65		0.63
G08	Stat3	1.11		1.20		0.82		1.08		0.74		0.68
G09	Tgfb1	1.52		0.99		0.40		0.65		0.26		0.40
G10	Th	2.02		0.59		0.05		0.29		0.02		0.08
G11	Tnr	1.31		1.36		0.72		1.04		0.55		0.53
G12	Vegfa	0.97		1.12		0.87		1.15		0.89		0.77
H01	Actb	0.65		0.31		0.22		0.48		0.34		0.71
H02	B2m	1.13		1.28		1.22		1.13		1.08		0.95
H03	Hprt1	1.26		1.30		1.81		1.04		1.44		1.39
H04	Ldha	0.81		0.63		0.27		0.79		0.33		0.43
H05	Rplp1	0.79		0.77		0.55		0.97		0.70		0.72

## Sheet: p-value
Position	Symbol	p-value
		PND 8 vs PND 12		PND 8 vs PND 16		PND 8 vs PND 40+		PND 12 vs PND 16		PND 12 vs PND 40+		PND 16 vs PND 40+
		p-value		p-value		p-value		p-value		p-value		p-value
A01	Ache	0.239460		0.456905		0.894048		0.135754		0.246067		0.302437
A02	Adora1	0.135741		0.078703		0.129225		0.324282		0.578881		0.528763
A03	Adora2a	0.743930		0.833007		0.472158		0.963633		0.325338		0.458414
A04	Alk	0.182276		0.778011		0.928798		0.166245		0.189768		0.957351
A05	Apbb1	0.438426		0.555340		0.962299		0.771343		0.588917		0.735138
A06	Apoe	0.352838		0.015192		0.165471		0.163407		0.396782		0.942680
A07	App	0.247053		0.050667		0.423932		0.762771		0.891389		0.691518
A08	Artn	0.119085		0.440118		0.475116		0.081756		0.714598		0.385488
A09	Ascl1	0.312926		0.630327		0.007196		0.858434		0.002771		0.048082
A10	Bcl2	0.998031		0.650658		0.567441		0.497915		0.466523		0.716111
A11	Bdnf	0.324421		0.155674		0.185904		0.219005		0.001390		0.073854
A12	Bmp2	0.449352		0.050629		0.014265		0.029111		0.001156		0.182230
B01	Bmp4	0.141224		0.397502		0.269827		0.925991		0.473627		0.631575
B02	Bmp8a	0.397243		0.428112		0.227089		0.198653		0.358123		0.157301
B03	Cdk5r1	0.010960		0.037240		0.082030		0.159494		0.216901		0.739663
B04	Cdk5rap2	0.225132		0.039006		0.112251		0.034785		0.226381		0.881552
B05	Chat	0.968558		0.187250		0.290334		0.193288		0.276934		0.088473
B06	Chrm2	0.173941		0.800183		0.575896		0.281866		0.435074		0.764892
B07	Creb1	0.277637		0.539875		0.099086		0.478021		0.143208		0.113866
B08	Cxcl1	0.116622		0.864330		0.268012		0.136191		0.886331		0.293018
B09	Dcx	0.333454		0.006295		0.005262		0.314781		0.278739		0.153175
B10	Dlg4	0.679279		0.563920		0.037758		0.431227		0.040786		0.066112
B11	Dll1	0.257637		0.620141		0.591443		0.156389		0.567521		0.385949
B12	Drd2	0.416076		0.099494		0.032032		0.021114		0.000943		0.012603
C01	Dvl3	0.758301		0.612121		0.094406		0.326631		0.036978		0.018227
C02	Efnb1	0.229670		0.013159		0.005519		0.045317		0.012374		0.015856
C03	Egf	0.626414		0.114841		0.435407		0.123792		0.520157		0.256796
C04	Ep300	0.185371		0.439099		0.089201		0.137216		0.050447		0.152035
C05	Erbb2	0.735473		0.123021		0.424749		0.232969		0.569527		0.756625
C06	Fgf2	0.251965		0.013733		0.074929		0.051705		0.239739		0.397679
C07	Flna	0.996343		0.067695		0.000979		0.078808		0.003448		0.585988
C08	Gdnf	0.857420		0.104782		0.243792		0.010216		0.145110		0.990105
C09	Gpi	0.364191		0.112859		0.504837		0.650590		0.278319		0.136980
C10	Grin1	0.201624		0.002143		0.883098		0.759525		0.239838		0.115477
C11	Hdac4	0.601671		0.374814		0.041984		0.676415		0.042141		0.022923
C12	Hes1	0.188165		0.557842		0.047058		0.143321		0.093563		0.049603
D01	Hey1	0.192353		0.908822		0.090567		0.297277		0.405267		0.126699
D02	Hey2	0.192647		0.890565		0.364063		0.236907		0.106619		0.375900
D03	Heyl	0.136945		0.037052		0.044679		0.484653		0.338683		0.119191
D04	Il3	0.272461		0.964053		0.025049		0.262419		0.360775		0.022309
D05	Lif	0.182045		0.082524		0.047923		0.399187		0.078294		0.124175
D06	Map2	0.236709		0.231579		0.002200		0.418725		0.005071		0.165133
D07	Mdk	0.542787		0.727799		0.551718		0.782495		0.940467		0.820100
D08	Mef2c	0.435451		0.415530		0.112537		0.916846		0.350691		0.128119
D09	Kmt2a	0.304158		0.592964		0.355562		0.318047		0.829376		0.485973
D10	Ndn	0.665192		0.085005		0.071871		0.084409		0.073091		0.793157
D11	Ndp	0.196445		0.014850		0.322277		0.790800		0.962546		0.793252
D12	Neurod1	0.670955		0.507941		0.135582		0.870346		0.238272		0.068128
E01	Neurog1	0.079141		0.039275		0.101060		0.768890		0.644147		0.482709
E02	Neurog2	0.641288		0.975256		0.320437		0.403492		0.410070		0.056572
E03	Nf1	0.065222		0.230435		0.781425		0.235301		0.092280		0.348639
E04	Nog	0.263227		0.007863		0.182690		0.482067		0.790705		0.733680
E05	Notch1	0.507958		0.579858		0.127407		0.903279		0.011464		0.020005
E06	Notch2	0.496358		0.564816		0.053816		0.335963		0.078290		0.225436
E07	Nrcam	0.547658		0.707999		0.063089		0.407011		0.129051		0.079628
E08	Nrg1	0.448861		0.115080		0.293793		0.109552		0.210907		0.333808
E09	Nrp1	0.271971		0.966787		0.007457		0.396655		0.000230		0.015779
E10	Nrp2	0.402158		0.081745		0.056804		0.234297		0.142715		0.140258
E11	Ntf3	0.146579		0.002003		0.498707		0.000567		0.352580		0.267969
E12	Ntn1	0.339131		0.353129		0.341535		0.349287		0.109816		0.349308
F01	Olig2	0.293136		0.859886		0.198535		0.445114		0.117152		0.364641
F02	Pafah1b1	0.825164		0.476144		0.126310		0.504712		0.098959		0.340418
F03	Pard3	0.326727		0.721828		0.346584		0.372618		0.187830		0.297646
F04	Pax2	0.163631		0.235156		0.205821		0.106805		0.618956		0.165699
F05	Pax3	0.650396		0.699571		0.974061		0.323134		0.468928		0.478575
F06	Pax6	0.746073		0.899449		0.447480		0.770255		0.465188		0.417315
F07	Pou3f3	0.552678		0.950084		0.087339		0.561643		0.284500		0.063217
F08	Pou4f1	0.079395		0.353439		0.096435		0.513151		0.434566		0.259299
F09	Ptn	0.458395		0.212344		0.060182		0.188994		0.003503		0.055995
F10	Rac1	0.994936		0.539575		0.265550		0.494437		0.206646		0.672811
F11	Robo1	0.511863		0.148492		0.098972		0.144696		0.038362		0.964335
F12	Rtn4	0.982098		0.470216		0.266634		0.475880		0.267240		0.642357
G01	S100a6	0.526802		0.995113		0.275184		0.446608		0.730179		0.119770
G02	S100b	0.254868		0.018577		0.000749		0.049016		0.003266		0.216535
G03	Shh	0.175051		0.407902		0.027474		0.880332		0.189526		0.243573
G04	Slit2	0.440189		0.907118		0.079447		0.511097		0.170714		0.094472
G05	Sod1	0.962162		0.609256		0.288428		0.483864		0.084176		0.352759
G06	Sox2	0.545355		0.663527		0.704797		0.296662		0.308693		0.913718
G07	Sox8	0.168028		0.091280		0.400885		0.843210		0.353801		0.315518
G08	Stat3	0.747216		0.567822		0.470156		0.900783		0.299425		0.057673
G09	Tgfb1	0.276710		0.962152		0.333769		0.270963		0.156248		0.346870
G10	Th	0.386370		0.419944		0.202334		0.138155		0.082207		0.024071
G11	Tnr	0.305774		0.245340		0.250520		0.976866		0.136055		0.103177
G12	Vegfa	0.850013		0.501727		0.654394		0.226716		0.726731		0.308115
H01	Actb	0.304305		0.105704		0.082807		0.007449		0.004480		0.123450
H02	B2m	0.429815		0.288828		0.173383		0.487579		0.415817		0.686928
H03	Hprt1	0.120016		0.204676		0.001805		0.763756		0.002654		0.057935
H04	Ldha	0.077827		0.005131		0.000683		0.031775		0.001269		0.001171
H05	Rplp1	0.162289		0.192167		0.016550		0.874101		0.008634		0.074228
